# Supplementary material for: Alignment-free Transcriptomic and Metatranscriptomic Comparison Using Sequencing Signatures with Variable Length Markov Chains
Source: PubMed Central journal article supplement (PMC5120338; doi:10.1038/srep37243), 2016-11-23
Supplement: srep37243-s1.pdf [file srep37243-s1.pdf]

**Supplementary Information**

**Title of manuscript:**

**Alignment-free Transcriptomic and Metatranscriptomic Comparison Using Sequencing Signatures with Variable Length Markov Chains**

**Authors:**

**Weinan Liao<sup>1†</sup>, Jie Ren<sup>2†</sup>, Kun Wang<sup>1</sup>, Shun Wang<sup>1</sup>, Feng Zeng<sup>1</sup>, Ying Wang<sup>1\*</sup>, Fengzhu Sun<sup>2\*</sup>**

**Supplementary information includes:**

Supplementary Tables S1-S6

Supplementary Figures S1-S6

Supplementary Reference

# 1. Comparison based on RNA-Seq data of Marine Microbial Eukaryotes in Experiment 2

## 1.1 Comparison based on 18 RNA-Seq data of Marine Microbial Eukaryotes in Experiment 2

**Table S1. Reference information for 18 RNA-seq<sup>1</sup> data in Experiment 2**

| SRA        | Strain    | 18S rRNA | Organisms                         | Kingdom   | Phylum      | Class                       |
|------------|-----------|----------|-----------------------------------|-----------|-------------|-----------------------------|
| SRR1300224 | CCMP1194  | AF203400 | <i>Prasinococcus sp.</i>          | Eukaryota | Chlorophyta | Prasinophyceae              |
| SRR1296862 | CCMP1413  | FN562437 | <i>Prasinoderma coloniale</i>     | Eukaryota | Chlorophyta | Prasinophyceae              |
| SRR1300428 | CCMP720   | KF615764 | <i>Polyblepharides amylifera</i>  | Eukaryota | Chlorophyta | Prasinophyceae              |
| SRR1296737 | CCMP725   | KF615765 | <i>Pyramimonas parkeae</i>        | Eukaryota | Chlorophyta | Prasinophyceae              |
| SRR1296860 | CCMP3274  | KF615766 | <i>Dolichomastix tenuilepis</i>   | Eukaryota | Chlorophyta | Mamiellophyceae             |
| SRR1296861 | CCMP3273  | KF615767 | <i>Crustomastix stigmatica</i>    | Eukaryota | Chlorophyta | Mamiellophyceae             |
| SRR3384777 | CCMP1545  | AY954994 | <i>Micromonas pusilla</i>         | Eukaryota | Chlorophyta | Mamiellophyceae             |
| SRR3384320 | RCC299    | HM191693 | <i>Micromonas sp.</i>             | Eukaryota | Chlorophyta | Mamiellophyceae             |
| SRR1300441 | CCMP2099  | AY954999 | <i>Micromonas sp.</i>             | Eukaryota | Chlorophyta | Mamiellophyceae             |
| SRR1300455 | CCAC1681  | FN562452 | <i>Micromonas pusilla</i>         | Eukaryota | Chlorophyta | Mamiellophyceae             |
| SRR1300295 | CCMP1646  | AY954996 | <i>Micromonas sp.</i>             | Eukaryota | Chlorophyta | Mamiellophyceae             |
| SRR1300453 | CCMP1898  | JX625115 | <i>Bathycoccus prasinos</i>       | Eukaryota | Chlorophyta | Mamiellophyceae             |
| SRR1294419 | CCMP717   | KF615768 | <i>Nephroselmis pyriformis</i>    | Eukaryota | Chlorophyta | Nephroselmidophyceae        |
| SRR1300322 | CCMP1897  | KF615769 | <i>Picocystis salinarum</i>       | Eukaryota | Chlorophyta | <i>Picocystis salinarum</i> |
| SRR1300422 | CCMP1998  | KF615770 | <i>Pycnococcus sp.</i>            | Eukaryota | Chlorophyta | Pycnoccaceae                |
| SRR1296698 | CCMP880   | JN376804 | <i>Tetraselmis astigmatica</i>    | Eukaryota | Chlorophyta | Chlorodendraceae            |
| SRR1294459 | SAG11-48b | KF615772 | <i>Chlamydomonas chlamydogama</i> | Eukaryota | Chlorophyta | Chlorophyceae               |
| SRR1294458 | SAG-1149  | KF615771 | <i>Chlamydomonas leiostraca</i>   | Eukaryota | Chlorophyta | Chlorophyceae               |

## 1.2 Comparison based on 22 RNA-Seq data of Marine Microbial Eukaryotes in Experiment 2

RNA-Seq data of 22 marine eukaryotes were downloaded from “The Marine Microbial Eukaryote Transcriptome Sequencing Project”. Sample information of these 22 eukaryotes is listed in Table S2. These eukaryotes have a clear phylogenetic evolution hierarchy. The phylogenetic tree of these 22 RNA-Seq data is built with MrBayes, which is a program for Bayesian inference and model choice across a wide range of phylogenetic and evolutionary models. The phylogenetic tree is built according to the following steps: First 18s rRNA sequences of 22 species are downloaded from Silva database <https://www.arb-silva.de/>. Multiple alignment of the 18s rRNA sequences is done by Sliva as well, and then MrBayes is used to build phylogenetic trees based on multiple alignment using the default settings. Finally

the tree is plotted using R package "ape" in the unrooted type. The phylogenetic tree of these 22 RNA-Seq data is represented in Figure S1A.

**Table S2. Reference information of 22 Marine Microbial Eukaryotes in Experiment 2**

| SRA       | Sample Name  | Abbreviation | Organisms                          | Kingdom   | Phylum          | Class               |
|-----------|--------------|--------------|------------------------------------|-----------|-----------------|---------------------|
| SRS618835 | MMETSP0397   | Ba-Fr-Cy     | <i>Cyclophora tenuis</i>           | Eukaryota | Bacillariophyta | Fragilariophyceae   |
| SRS626644 | MMETSP0693   | Ba-Fr-Th     | <i>Thalassionema nitzschioides</i> | Eukaryota | Bacillariophyta | Fragilariophyceae   |
| SRS619074 | MMETSP0009_2 | Ba-Fr-Gr     | <i>Grammatophora oceanica</i>      | Eukaryota | Bacillariophyta | Fragilariophyceae   |
| SRS619075 | MMETSP0902   | Ba-Co-Th     | <i>Thalassiosira antarctica</i>    | Eukaryota | Bacillariophyta | Coscinodiscophyceae |
| SRS616853 | MMETSP0010_2 | Ba-Co-Co     | <i>Corethron hystrix</i>           | Eukaryota | Bacillariophyta | Coscinodiscophyceae |
| SRS616855 | MMETSP0013_2 | Ba-Co-Sk     | <i>Skeletonema costatum</i>        | Eukaryota | Bacillariophyta | Coscinodiscophyceae |
| SRS621600 | MMETSP1437   | Ba-Me-Eu     | <i>Eucampia antarctica</i>         | Eukaryota | Bacillariophyta | Mediophyceae        |
| SRS616865 | MMETSP1002   | Ba-Me-Di     | <i>Ditylum brightwellii</i>        | Eukaryota | Bacillariophyta | Mediophyceae        |
| SRS616857 | MMETSP0015_2 | Ba-Me-Od     | <i>Odontella aurita</i>            | Eukaryota | Bacillariophyta | Mediophyceae        |
| SRS621548 | MMETSP1404   | Ch-Ma-Mi     | <i>Micromonas pusilla</i>          | Eukaryota | Chlorophyta     | Mamiellophyceae     |
| SRS621593 | MMETSP1460   | Ch-Ma-Ba     | <i>Bathycoccus prasinos</i>        | Eukaryota | Chlorophyta     | Mamiellophyceae     |
| SRS621618 | MMETSP1468   | Ch-Ma-Ma     | <i>Mantoniella</i>                 | Eukaryota | Chlorophyta     | Mamiellophyceae     |
| SRS621597 | MMETSP1459   | Ch-Py-Py1    | <i>Pycnococcus provasolii</i>      | Eukaryota | Chlorophyta     | Pycnococcaceae      |
| SRS621453 | MMETSP1316   | Ch-Py-Py2    | <i>Pycnococcus provasolii</i>      | Eukaryota | Chlorophyta     | Pycnococcaceae      |
| SRP042159 | MMETSP1085   | Ch-Py-Py3    | <i>Pycnococcus</i>                 | Eukaryota | Chlorophyta     | Pycnococcaceae      |
| SRS621414 | MMETSP1161   | Ch-Tr-Pi1    | <i>Picochlorum oklahomense</i>     | Eukaryota | Chlorophyta     | Trebouxiophyceae    |
| SRS621479 | MMETSP1330   | Ch-Tr-Pi2    | <i>Picochlorum</i>                 | Eukaryota | Chlorophyta     | Trebouxiophyceae    |
| SRS616859 | MMETSP0038_2 | Cr-Cr-Crp    | <i>Cryptomonas paramecium</i>      | Eukaryota | Cryptophyta     | Cryptomonadaceae    |
| SRS621448 | MMETSP1050   | Cr-Cr-Crc    | <i>Cryptomonas curvata</i>         | Eukaryota | Cryptophyta     | Cryptomonadaceae    |
| SRS621446 | MMETSP1049   | Cr-Ge-Pr     | <i>Proteomonas sulcata</i>         | Eukaryota | Cryptophyta     | Geminigeraceae      |
| SRS621409 | MMETSP1102   | Cr-Ge-Ge1    | <i>Geminigera</i>                  | Eukaryota | Cryptophyta     | Geminigeraceae      |
| SRS618815 | MMETSP0799   | Cr-Ge-Ge2    | <i>Geminigera cryophila</i>        | Eukaryota | Cryptophyta     | Geminigeraceae      |

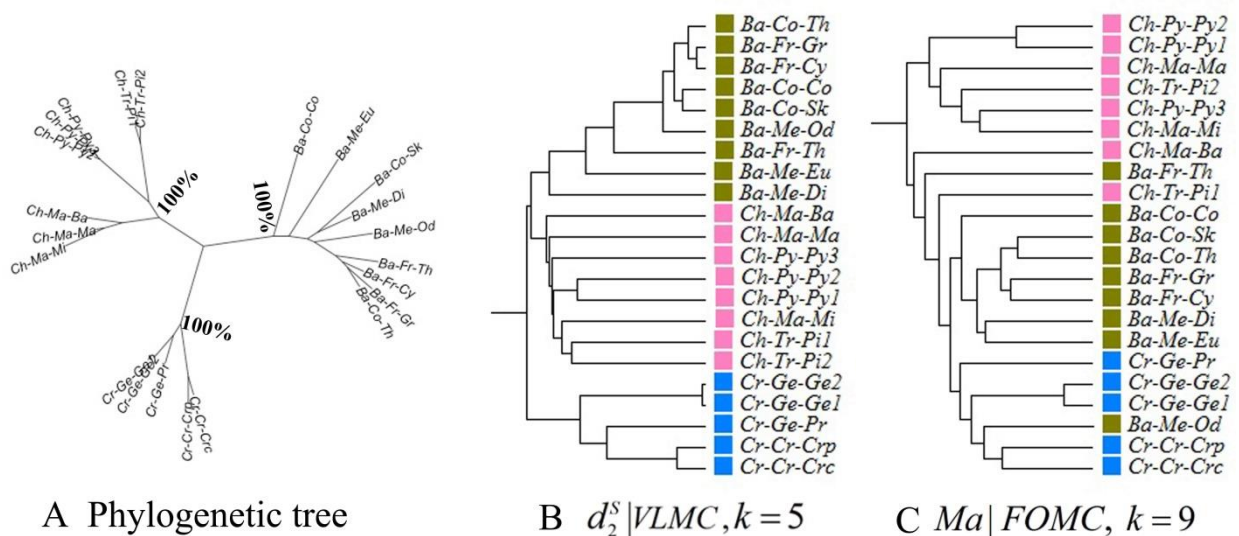

**Figure S1. Reference tree and the derived clustering trees based on different models for 22 RNA-Seq data of microbial eukaryotes in experiment 2. (A) The phylogenetic tree of 22 RNA-Seq data built with MrBayes3. (B) The best clustering tree with VLMC. (C) The best clustering tree with FOMC and Lp-norm measures. \* Samples are labeled as "phylum-class-organism". For example, for sample Ba-Fr-Cy, Ba represents phylum**

*Bacillariophyta*, Fr represents class *Fragilariophyceae*, and Cy represents the organism *Cyclophora tenuis*. Details about sample labels can be found in Table S2. Posterior probabilities with 100% support are shown at nodes in Figure S1 (A).

Table S3 shows the Triple metric between the standard tree and the derived clustering using various dissimilarity measures and tuple length. The best clustering result with the smallest Triple metric of 469 is obtained from VLMC using dissimilarity measures  $d_2^S$  with tuple length  $k=5$ . Figure S1B shows the derived clustering using  $d_2^S$  based on VLMC and tuple length  $k=5$ . The samples are grouped according to phylum first and then class. The samples from the same phyla are clustered together very well. However, samples from the same class cannot be clearly grouped together. The smallest Triple metric of FOMC is 750, which was achieved by using *Ma* and  $k=9$ . Figure S1C shows the corresponding clustering results, and even samples from the same phylum cannot be grouped together. The clustering result based on VLMC is obviously better than the result based on  $d_2^S$  or  $d_2^*$  under the FOMC model.

**Table S3. Triples metric between the reference tree and the derived clustering tree using various dissimilarity measures and background sequence models of 22 RNA-Seq data of microbial eukaryotes in Experiment 2**

| $k$                            |               | 2    | 3    | 4    | 5          | 6    | 7    | 8    | 9          |
|--------------------------------|---------------|------|------|------|------------|------|------|------|------------|
| VLMC                           | $d_2^S$       | 1114 | 697  | 656  | <b>469</b> | 645  | 647  | 791  | 800        |
|                                | $d_2^*$       | 1091 | 739  | 630  | 564        | 643  | 726  | 799  | 878        |
| FOMC                           | $d_2^S   M_0$ | 963  | 941  | 899  | 840        | 853  | 857  | 869  | 922        |
|                                | $d_2^S   M_1$ | 1114 | 881  | 950  | 912        | 876  | 945  | 953  | 947        |
|                                | $d_2^S   M_2$ | NA   | 1103 | 944  | 874        | 979  | 933  | 909  | 798        |
|                                | $d_2^S   M_3$ | NA   | NA   | 1028 | 855        | 910  | 934  | 932  | 811        |
|                                | $d_2^*   M_0$ | 917  | 902  | 902  | 900        | 905  | 979  | 976  | 1010       |
|                                | $d_2^*   M_1$ | 1091 | 895  | 951  | 903        | 917  | 975  | 1038 | 1046       |
|                                | $d_2^*   M_2$ | NA   | 973  | 890  | 709        | 1007 | 1017 | 1055 | 1037       |
|                                | $d_2^*   M_3$ | NA   | NA   | 946  | 935        | 871  | 934  | 1055 | 1059       |
| $L_p$ -Norm and $d_2$ measures | $d_2$         | 905  | 923  | 930  | 931        | 954  | 952  | 932  | 982        |
|                                | <i>Ch</i>     | 848  | 929  | 943  | 448        | 945  | 942  | 988  | 1045       |
|                                | <i>Eu</i>     | 925  | 923  | 930  | 951        | 952  | 942  | 941  | 1015       |
|                                | <i>Ma</i>     | 935  | 923  | 923  | 923        | 923  | 918  | 890  | <b>750</b> |

## 2. Comparison based on 88 global ocean metatranscriptomic samples in Experiment 3

**Table S4. Description of datasets from 13 communities/projects used in experiment 3**

| Dataset ID & Name            | Sequencing Platform | Database | Accession number in Database | Type and Number of Samples       | Latitude    | Longitude    |
|------------------------------|---------------------|----------|------------------------------|----------------------------------|-------------|--------------|
| 1. Hawaii_Aug_DOM            | 454                 | CAMERA   | CAM_P_0000715                | 7 MT (4 control & 3 Amended)     | 23.18533333 | -158.9393333 |
| 2. Hawaii_Aug_DSW            | 454                 | CAMERA   | CAM_P_0000766                | 10 MT (5 control & 5 Amended)    | 23.18533333 | -158.9393333 |
| 3. Hawaii_Nov_Day Night      | 454                 | CAMERA   | CAM_PROJ_DayNight            | 2 MT                             | 23.18533333 | -158.9393333 |
| 4. Georgia                   | 454                 | CAMERA   | CAM_PROJ_CAM_P0000101        | 6 MT (2 control & 2 PUT & 2 SPD) | 31.47744    | -81.24176    |
| 5. Mexico                    | 454                 | CAMERA   | CAM_PROJ_DICE                | 4 MT (2 control & 2 Amended)     | 30.050233   | -87.829467   |
| 6. Eastern Equa Atlan_Amazon | 454                 | CAMERA   | CAM_PROJ_AmazonRiverPlume    | 19 MT                            | 12.28466667 | 56.1245      |
| 7. California_Deep sea       | 454                 | CAMERA   | CAM_P_0000545                | 4 MT                             | 27.506      | -111.3469667 |
| 8. Norway                    | 454                 | CAMERA   | CAM_PROJ_PML                 | 4 MT (2 control & 2 Amended)     | 60.269444   | 5.2222223    |
| 9. Hawaii_depth              | 454                 | CAMERA   | CAM_PROJ_HOT                 | 4 MT                             | 23.18533333 | -158.9393333 |
| 10. SWGE                     | 454                 | CAMERA   | CAM_PROJ_GeneExpression      | 14 MT                            | None        |              |
| 11. WesternEnglish           | 454                 | CAMERA   | CAM_PROJ_WesternChannelOM    | 8 MT & 8 MG                      | 50.251667   | -4.208889    |
| 12. NPSG                     | 454                 | CAMERA   | SRA007802.3/SRA007804.3/     | 4 MG62 replicates                | 23.18533333 | -158.9393333 |
|                              | 454                 | CAMERA   | SRA007806.3/SRA000263/       | &                                |             |              |
|                              | 454                 | CAMERA   | SRA007801.5/SRA000262/       | 4 MT2 replicates                 |             |              |
|                              | 454                 | CAMERA   | SRA007803.3/SRA007805.4      |                                  |             |              |
| 13. Mouse_Intestinal         | Illumina            | NCBI SRA | SRA051354                    | 7 MT                             | None        |              |

\*MT: Metatranscriptomic data; MG: Metagenomic data; PUT: Putrescine; SPD: Spermidine; DOM: Dissolved Organic Matter; DSW: Deep SeaWater. The 12 datasets are collected from CAMERA and NCBI SRA datasets. Some of them have corresponding datasets, others are submitted to datasets. The first column indicates the symbol name in this paper.

### 3. Comparison of gradient relationships based on metatranscriptomic samples from different iron-rich microbial mats in Experiment 5

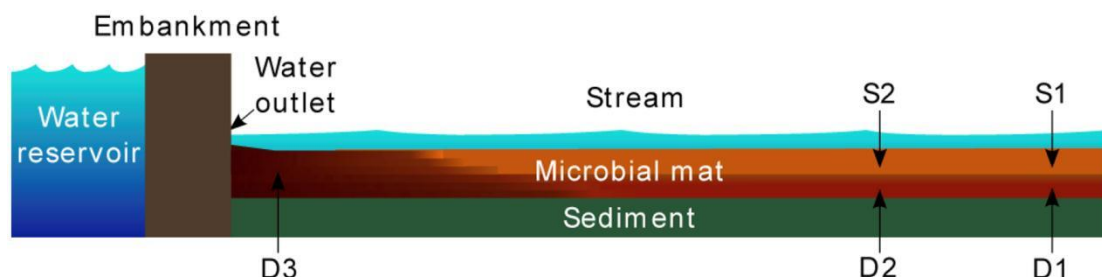

Figure S2. Sampling sites<sup>2</sup> of 14 metatranscriptomic samples in Experiment 5

Table S5. Reference information for iron-rich metatranscriptomic samples in experiment 5

| Assay_Type | Run       | Sample_Name         | Depth        | LibraryLayout | Organism_s               | Platform |
|------------|-----------|---------------------|--------------|---------------|--------------------------|----------|
| RNA-Seq    | ERR435880 | S1_11_sang_des_fees | 1 cm below   | SINGLE        | microbial mat metagenome | LS454    |
| RNA-Seq    | ERR435899 | S1_12_sang_des_fees | 1 cm below   | SINGLE        | microbial mat metagenome | LS454    |
| RNA-Seq    | ERR435900 | S1_13_sang_des_fees | 1 cm below   | SINGLE        | microbial mat metagenome | LS454    |
| RNA-Seq    | ERR435901 | S2_41_sang_des_fees | 1 cm below   | SINGLE        | microbial mat metagenome | LS454    |
| RNA-Seq    | ERR435902 | S2_42_sang_des_fees | 1 cm below   | SINGLE        | microbial mat metagenome | LS454    |
| RNA-Seq    | ERR435903 | S2_43_sang_des_fees | 1 cm below   | SINGLE        | microbial mat metagenome | LS454    |
| RNA-Seq    | ERR435904 | D1_21_sang_des_fees | 7-9 cm below | SINGLE        | microbial mat metagenome | LS454    |
| RNA-Seq    | ERR435905 | D1_22_sang_des_fees | 7-9 cm below | SINGLE        | microbial mat metagenome | LS454    |
| RNA-Seq    | ERR435906 | D1_23_sang_des_fees | 7-9 cm below | SINGLE        | microbial mat metagenome | LS454    |
| RNA-Seq    | ERR435907 | D2_31_sang_des_fees | 7-9 cm below | SINGLE        | microbial mat metagenome | LS454    |
| miRNA-Seq  | ERR435908 | D2_32_sang_des_fees | 7-9 cm below | SINGLE        | microbial mat metagenome | LS454    |
| RNA-Seq    | ERR435909 | D2_33_sang_des_fees | 7-9 cm below | SINGLE        | microbial mat metagenome | LS454    |
| RNA-Seq    | ERR435910 | D3_51_sang_des_fees | 7-9 cm below | SINGLE        | microbial mat metagenome | LS454    |
| RNA-Seq    | ERR435911 | D3_52_sang_des_fees | 7-9 cm below | SINGLE        | microbial mat metagenome | LS454    |

#### 4. PCA with different k values for VLMC and FOMC in Experiment 5

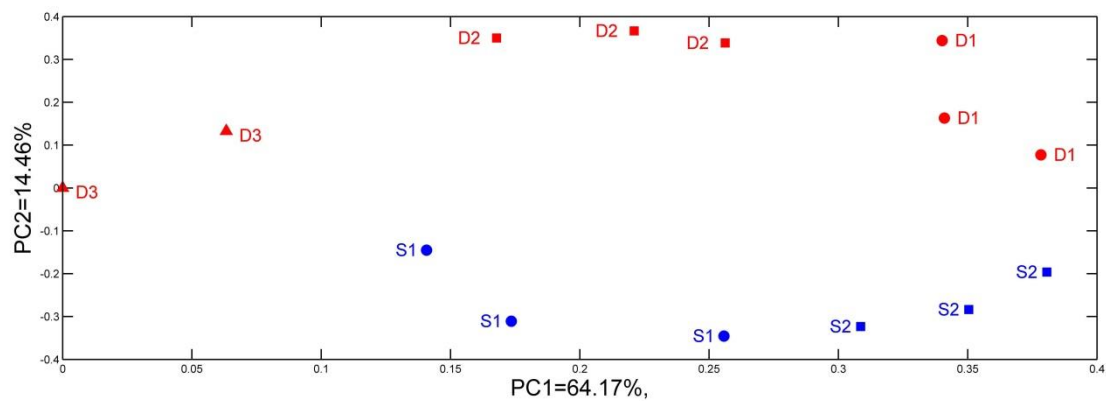

A: PCA ordination:  $d_2^S | VLMC, k = 7$

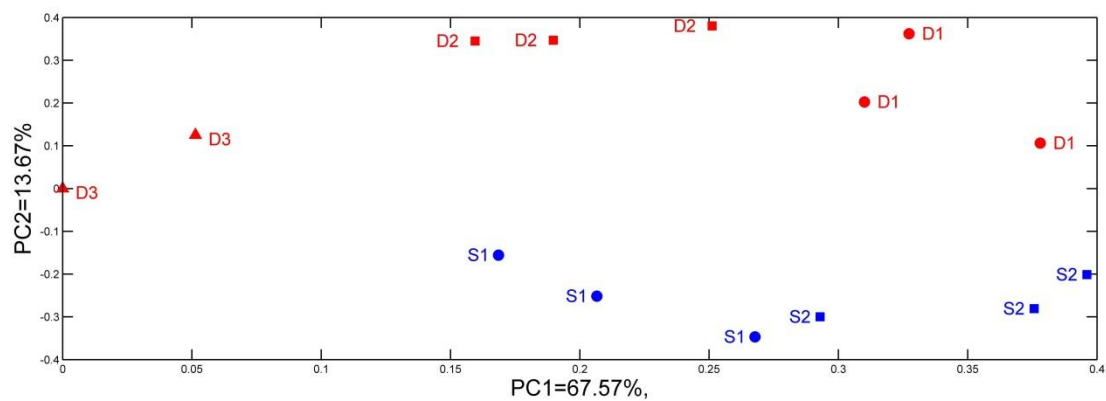

B: PCA ordination:  $d_2^S | VLMC, k = 9$

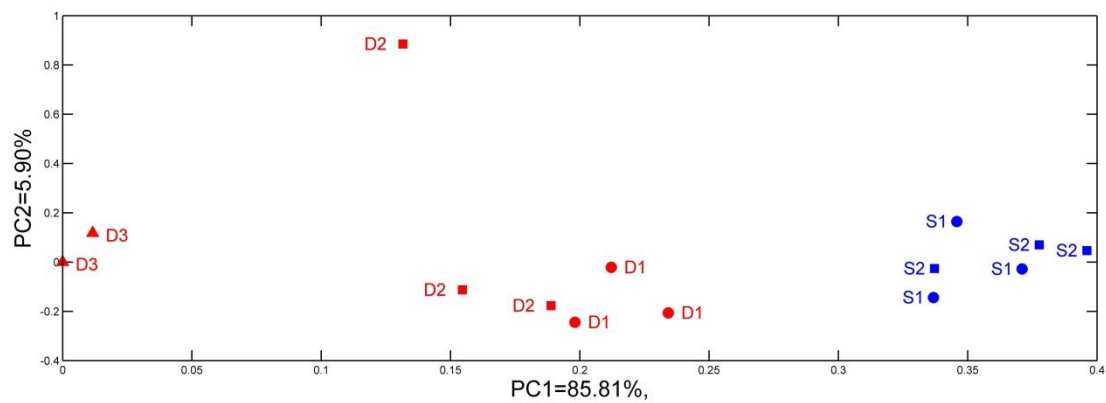

C: PCA ordination:  $d_2^* | M_1, k = 7$

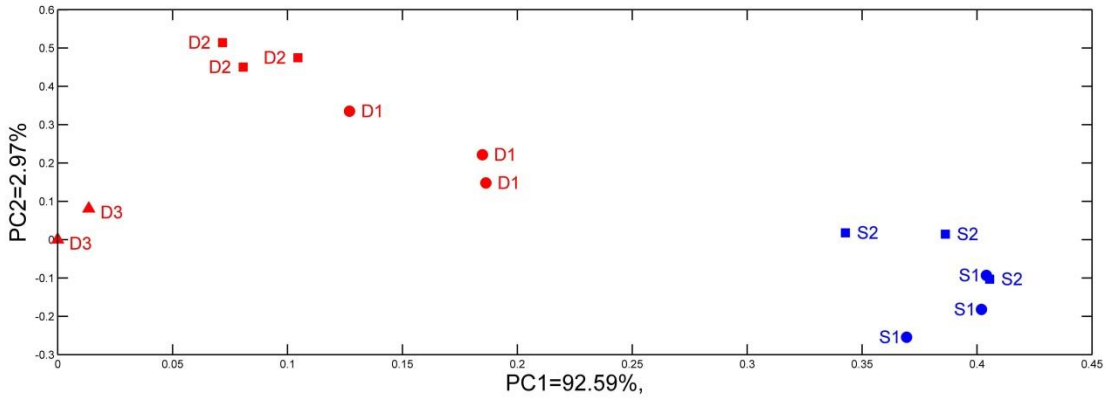

D: PCA ordination:  $d_2^* | M_1, k = 9$

Figure S3. PCA ordinates of samples with different  $k$  in Experiment 5

### 5. Clustering profile of a real mammalian gut metagenomic dataset

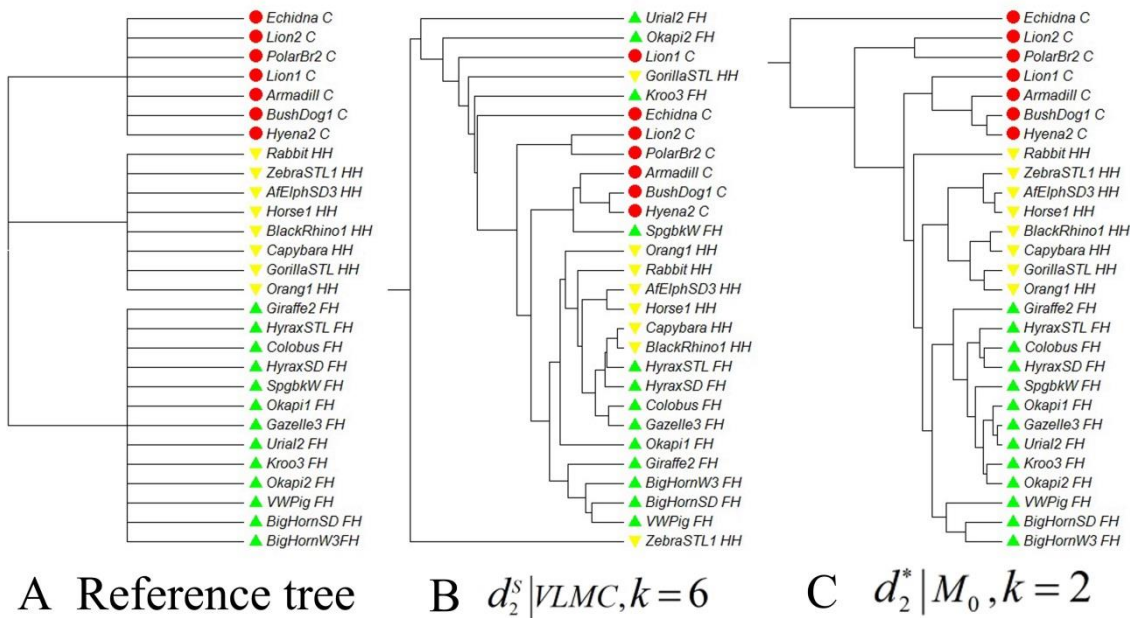

A Reference tree

B  $d_2^s | VLMC, k = 6$

C  $d_2^* | M_0, k = 2$

Figure S4. Clustering results of the 28 mammalian gut samples: Green upward triangles denote foregut-fermenting herbivore; yellow downward triangles denote hindgut-fermenting herbivore; red discs denote simple-gut carnivore. (A) Reference tree of 28 mammalian gut samples. (B) Best clustering tree with VLMC and  $L_p$ -norm measures. (C) Best clustering tree with FOMC.



## 6. Comparison between FOMC model and VLMC model

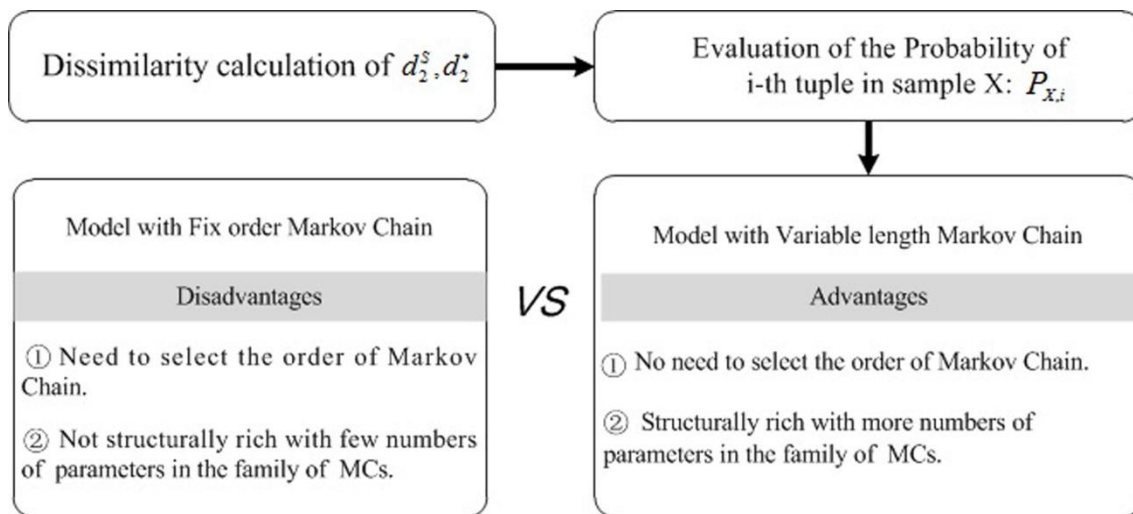

**Figure S5. FOMC model (left) compared to VLMC model (right)**

## 7. Comparison among Triple metric, Parsimony score and Symmetric difference scores

We made the comparison among Triple metric, Parsimony scores and Symmetric difference. It is found that Triple metric can measure the difference most accurately than other two difference metrics. The Symmetric difference is the number of nodes that are in one tree and not in the other one. Parsimony score for a tree is the sum of the smallest number of substitutions needed comparing with the reference tree. Compared with Parsimony score, Symmetric difference takes the order of hierarchical clustering into consideration. Triple metric can compare general leaf labelled rooted trees of arbitrary degree<sup>3</sup>. The algorithm enumerates all subsets of leaves of size three and counts how often the topologies induced by the three agree in the two trees.

We found that Triple metric can measure the distance between two rooted bifurcating trees more accurately than Symmetric difference. Take the Figure S6 as an example, Tree B and C has one and two misclassifications respectively. The Symmetric difference between Tree B/C and Tree A are both 8 and the Parsimony scores for Tree B/C are both 1, which cannot reflect the better performance of Tree B. And the distance measured by Triple metric between Tree B&A is 40 and Tree C&A is 55, which reflect the better performance of Tree B.

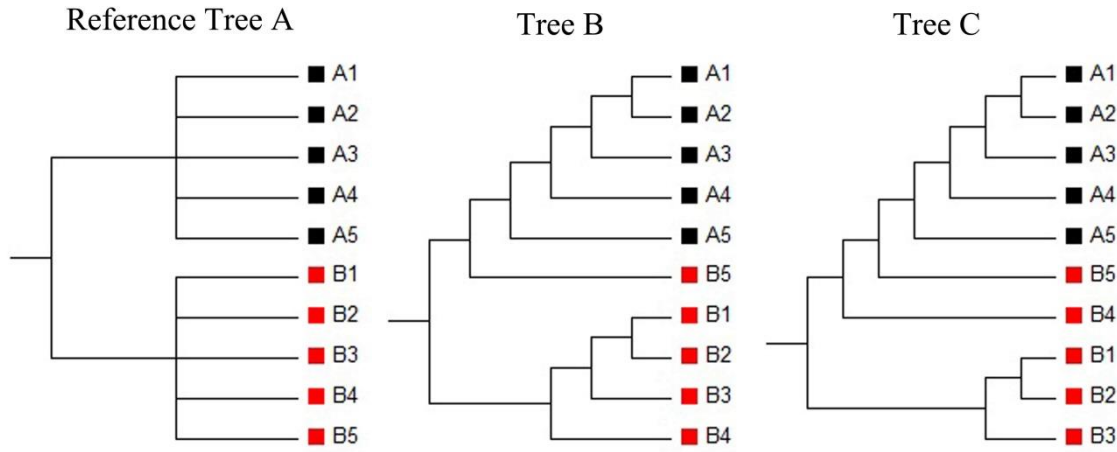

**Figure S6. Example trees to compare Triple metric, Parsimony score and Symmetric difference scores**

Furthermore, we listed the Triple metric, Parsimony scores and Symmetric difference scores table of Experiment 5 in Table S6 to further illustrate the consistence between the three indexes and the accuracy of Triple metric than Symmetric difference and Parsimony score. In Table S6, the smallest Triples metric is formatted in bold black text, the smallest Symmetric differences is in bold red font and the smallest Pasimony score is in bold purple font. It is shown that a group of trees with same scores for both Symmetric differences and pasimony scores, however, have more hierarchical and diverse rating scores for the Triples metric. Based on the above analysis, more-refined comparison can be implemented with the Triples metric when measuring the difference among trees and we adopted Triple metric as the index to compare the topological difference between reference and clustering trees in our study.

**Table S6. Comparison between Triples metric(abbreviated as  $tt$ ), Symmetric differences(abbreviated as  $sd$ ) and Pasimony scores (abbreviated as  $ps$ )between the reference tree and the derived clustering tree using various dissimilarity measures and background sequence models to identify the gradient relationships of metatranscriptomic samples of microbial mats in Experiment 5.**

|      |               | $k$  | 2   | 3   | 4   | 5   | 6   | 7         | 8         | 9         |
|------|---------------|------|-----|-----|-----|-----|-----|-----------|-----------|-----------|
| VLMC | $d_2^S$       | $tt$ | 251 | 251 | 283 | 274 | 245 | 195       | <b>76</b> | <b>76</b> |
|      |               | $sd$ | 14  | 14  | 14  | 14  | 14  | 14        | <b>10</b> | <b>10</b> |
|      |               | $ps$ | 9   | 10  | 10  | 9   | 9   | 8         | <b>5</b>  | 6         |
|      | $d_2^*$       | $tt$ | 251 | 274 | 273 | 263 | 228 | 210       | <b>76</b> | 262       |
|      |               | $sd$ | 14  | 14  | 14  | 14  | 14  | 14        | <b>10</b> | 14        |
|      |               | $ps$ | 9   | 9   | 9   | 9   | 8   | 7         | <b>5</b>  | 9         |
| FOMC | $d_2^S   M_0$ | $tt$ | 218 | 189 | 189 | 202 | 202 | 178       | 201       | 189       |
|      |               | $sd$ | 14  | 14  | 14  | 14  | 14  | <b>12</b> | 14        | 14        |
|      |               | $ps$ | 8   | 8   | 8   | 8   | 7   | <b>5</b>  | 6         | 6         |
|      | $d_2^S   M_1$ | $tt$ | 251 | 248 | 159 | 202 | 201 | 178       | 201       | 189       |
|      |               | $sd$ | 14  | 14  | 14  | 14  | 14  | <b>12</b> | 14        | 14        |
|      |               | $ps$ | 9   | 9   | 8   | 8   | 6   | <b>5</b>  | 6         | 6         |
|      | $d_2^S   M_2$ | $tt$ | NA  | 276 | 154 | 197 | 201 | 178       | 201       | 189       |

|                                                                                                                                                                                                                                                                                                                                |                                         |           |           |     |           |           |           |            |            |            |
|--------------------------------------------------------------------------------------------------------------------------------------------------------------------------------------------------------------------------------------------------------------------------------------------------------------------------------|-----------------------------------------|-----------|-----------|-----|-----------|-----------|-----------|------------|------------|------------|
|                                                                                                                                                                                                                                                                                                                                |                                         | <i>sd</i> | NA        | 14  | <b>12</b> | 14        | 14        | <b>12</b>  | 14         | 14         |
|                                                                                                                                                                                                                                                                                                                                |                                         | <i>ps</i> | NA        | 10  | 8         | 8         | 6         | <b>5</b>   | 6          | 6          |
|                                                                                                                                                                                                                                                                                                                                | $d_2^s   M_3$                           | <i>tt</i> | NA        | NA  | 272       | 201       | 118       | 164        | 170        | 189        |
|                                                                                                                                                                                                                                                                                                                                |                                         | <i>sd</i> | NA        | NA  | 14        | 14        | <b>12</b> | 14         | 14         | 14         |
|                                                                                                                                                                                                                                                                                                                                |                                         | <i>ps</i> | NA        | NA  | 10        | 6         | <b>5</b>  | <b>5</b>   | <b>5</b>   | 6          |
|                                                                                                                                                                                                                                                                                                                                | $d_2^*   M_0$                           | <i>tt</i> | 251       | 222 | 221       | 159       | 202       | 178        | 178        | <b>148</b> |
|                                                                                                                                                                                                                                                                                                                                |                                         | <i>sd</i> | 14        | 14  | 14        | 14        | 14        | <b>12</b>  | <b>12</b>  | <b>12</b>  |
|                                                                                                                                                                                                                                                                                                                                |                                         | <i>ps</i> | 9         | 8   | 9         | 7         | 7         | 6          | <b>5</b>   | <b>5</b>   |
|                                                                                                                                                                                                                                                                                                                                | $d_2^*   M_1$                           | <i>tt</i> | 251       | 218 | 159       | 202       | 195       | 178        | <b>148</b> | <b>148</b> |
|                                                                                                                                                                                                                                                                                                                                |                                         | <i>sd</i> | 14        | 14  | 14        | 14        | 14        | <b>12</b>  | <b>12</b>  | <b>12</b>  |
|                                                                                                                                                                                                                                                                                                                                |                                         | <i>ps</i> | 9         | 8   | 7         | 8         | 7         | <b>5</b>   | <b>5</b>   | <b>5</b>   |
|                                                                                                                                                                                                                                                                                                                                | $d_2^*   M_2$                           | <i>tt</i> | NA        | 274 | 154       | 154       | 195       | 178        | <b>148</b> | <b>148</b> |
|                                                                                                                                                                                                                                                                                                                                |                                         | <i>sd</i> | NA        | 14  | <b>12</b> | <b>12</b> | 14        | <b>12</b>  | <b>12</b>  | <b>12</b>  |
|                                                                                                                                                                                                                                                                                                                                |                                         | <i>ps</i> | NA        | 9   | 8         | 7         | 6         | <b>5</b>   | <b>5</b>   | <b>5</b>   |
|                                                                                                                                                                                                                                                                                                                                | $d_2^*   M_3$                           | <i>tt</i> | NA        | NA  | 268       | 201       | 195       | <b>148</b> | <b>148</b> | <b>148</b> |
|                                                                                                                                                                                                                                                                                                                                |                                         | <i>sd</i> | NA        | NA  | 14        | 14        | 14        | <b>12</b>  | <b>12</b>  | <b>12</b>  |
|                                                                                                                                                                                                                                                                                                                                |                                         | <i>ps</i> | NA        | NA  | 9         | 7         | 6         | <b>5</b>   | <b>5</b>   | <b>5</b>   |
|                                                                                                                                                                                                                                                                                                                                | $L_p$<br>-Norm<br>and<br>$d_2$ measures | $d_2$     | <i>tt</i> | 264 | 218       | 213       | 159       | 198        | 178        | 178        |
| <i>sd</i>                                                                                                                                                                                                                                                                                                                      |                                         |           | 14        | 14  | 14        | 14        | 14        | <b>12</b>  | <b>12</b>  | <b>12</b>  |
| <i>ps</i>                                                                                                                                                                                                                                                                                                                      |                                         |           | 11        | 10  | 9         | 7         | 7         | 6          | <b>5</b>   | <b>5</b>   |
| <i>Ch</i>                                                                                                                                                                                                                                                                                                                      |                                         | <i>tt</i> | 264       | 247 | 256       | 260       | 241       | 207        | 232        | 238        |
|                                                                                                                                                                                                                                                                                                                                |                                         | <i>sd</i> | 14        | 14  | 14        | 14        | 14        | 14         | <b>12</b>  | <b>12</b>  |
|                                                                                                                                                                                                                                                                                                                                |                                         | <i>ps</i> | 11        | 10  | 9         | 9         | 9         | 7          | <b>5</b>   | <b>5</b>   |
| <i>Eu</i>                                                                                                                                                                                                                                                                                                                      |                                         | <i>tt</i> | 264       | 218 | 213       | 159       | 198       | 165        | 162        | 162        |
|                                                                                                                                                                                                                                                                                                                                |                                         | <i>sd</i> | 14        | 14  | 14        | 14        | 14        | 14         | 14         | 14         |
|                                                                                                                                                                                                                                                                                                                                |                                         | <i>ps</i> | 11        | 10  | 9         | 7         | 7         | 7          | 6          | 6          |
| <i>Ma</i>                                                                                                                                                                                                                                                                                                                      |                                         | <i>tt</i> | 264       | 218 | 213       | 159       | 198       | 206        | 206        | 202        |
|                                                                                                                                                                                                                                                                                                                                |                                         | <i>sd</i> | 14        | 14  | 14        | 14        | 14        | 14         | 14         | 14         |
|                                                                                                                                                                                                                                                                                                                                |                                         | <i>ps</i> | 11        | 10  | 10        | 6         | 7         | 7          | 7          | 7          |
| <p>“<math>M_i</math>” indicates that the expected counts are calculated based on an i-th order Markov model for the background sequences. The p-values are estimated by comparing observed triples metric to the triples metric in 3000 randomly-joined trees: for all triples metric in table: <math>p &lt; 0.001</math>.</p> |                                         |           |           |     |           |           |           |            |            |            |

#### SUPPLEMENTARY REFERENCE

- 1 Duanmu, D. *et al.* Marine algae and land plants share conserved phytochrome signaling systems. *Proceedings of the National Academy of Sciences* **111**, 15827-15832 (2014).
- 2 Quaiser, A. *et al.* Unraveling the stratification of an iron-oxidizing microbial mat by metatranscriptomics. *PLoS One* **9**(7) **e102561** (2014).
- 3 Schafer, M. & Crichlow, S. Antecedents of Groupthink A Quantitative Study. *Journal of Conflict Resolution* **40**, 415-435 (1996).
